# Supplementary material for: Mapping Groundwater-Dependent Ecosystems in the Urumqi River and Chai Wo-pu Basins Using Geospatial Technologies and Field Data
Source: Copernicus journal article supplement (doi:10.5194/egusphere-2024-4153), 2025-02-03
Supplement: Supplementary file 1 [file egusphere-2024-4153-supplement.pdf]

# Supplement

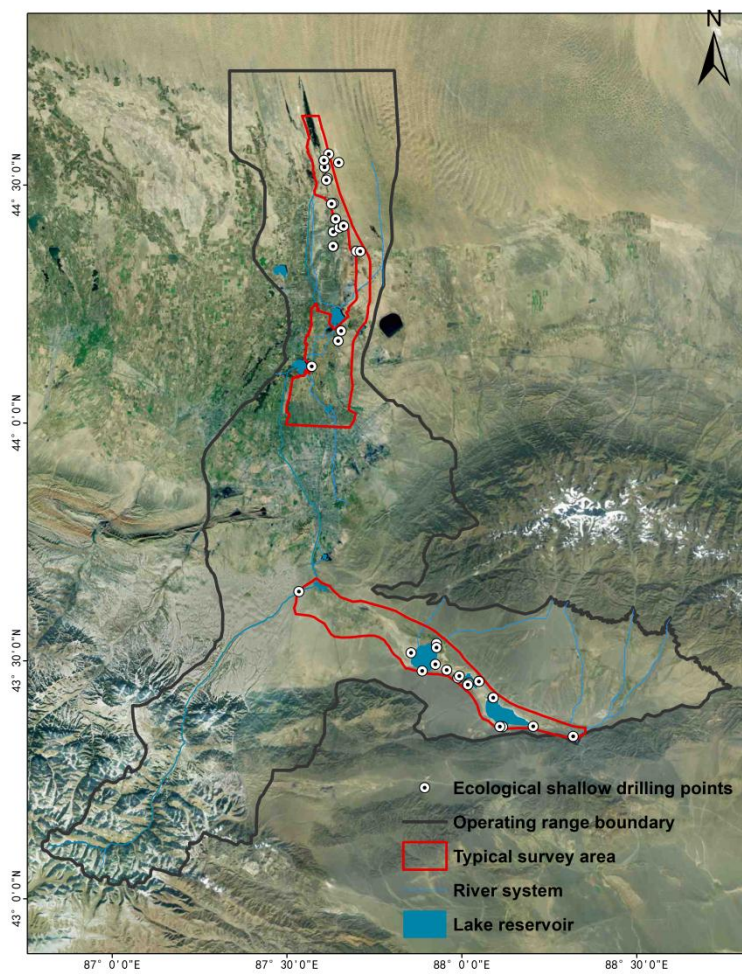

Figure S1: Ecological shallow drilling points

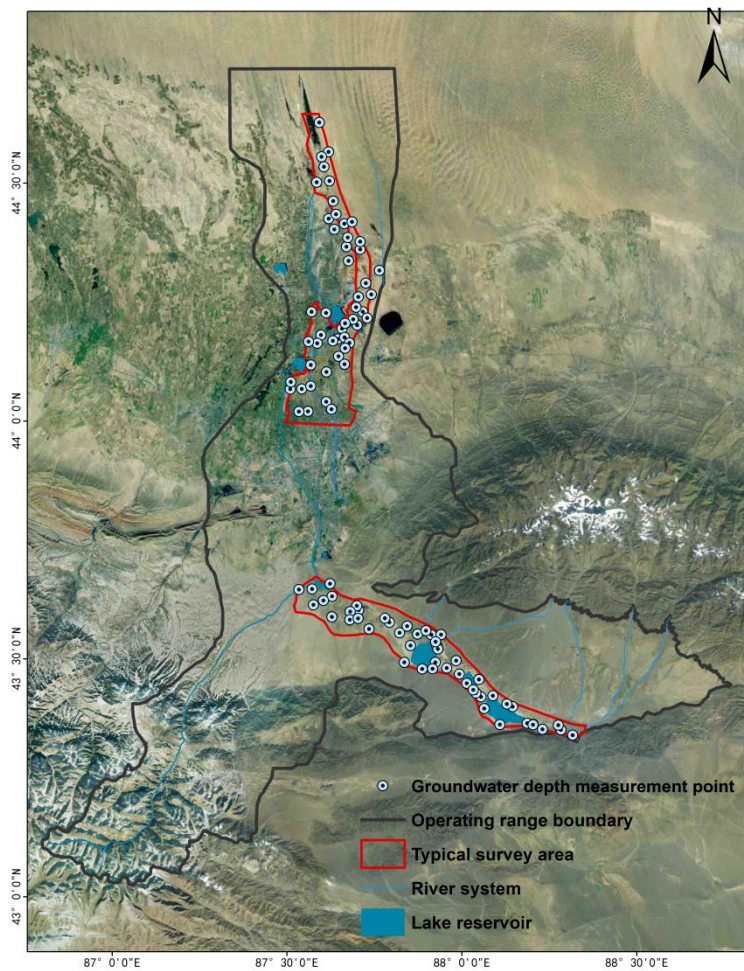

**Figure S2: Groundwater depth measurement location distribution**

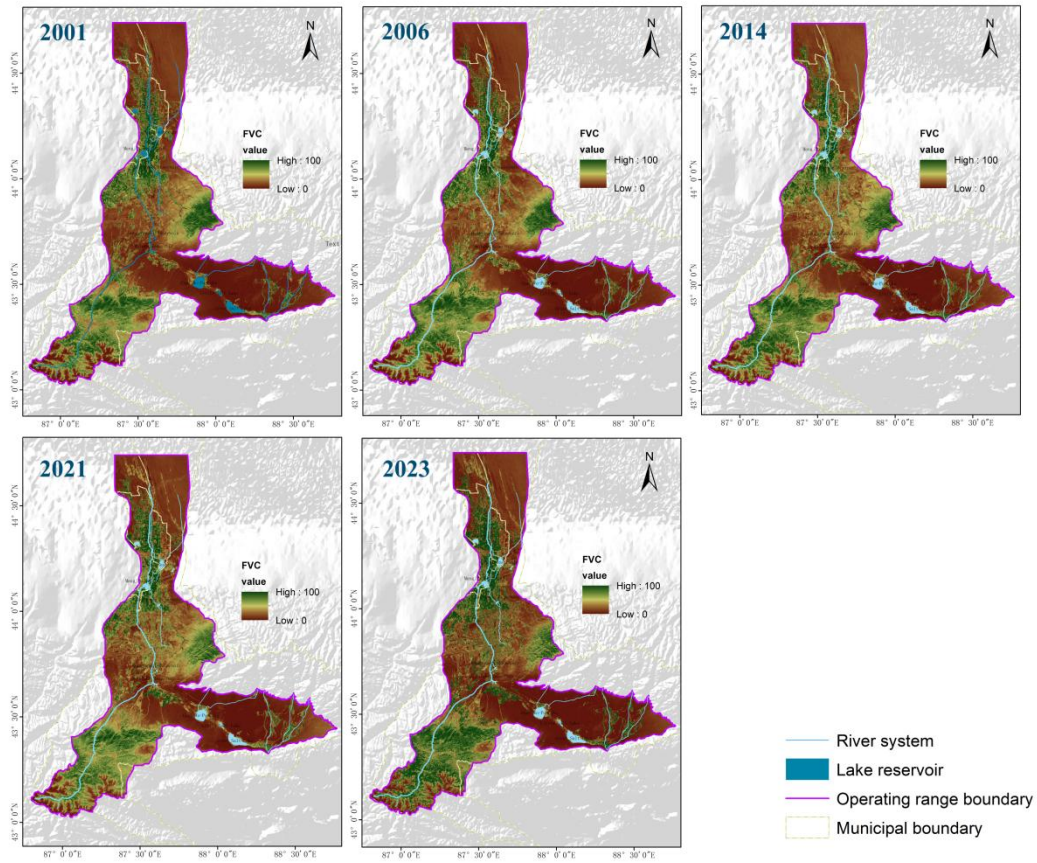

**Figure S3: Distribution of FVC in Urumqi River and Chai Wo-pu Basin**



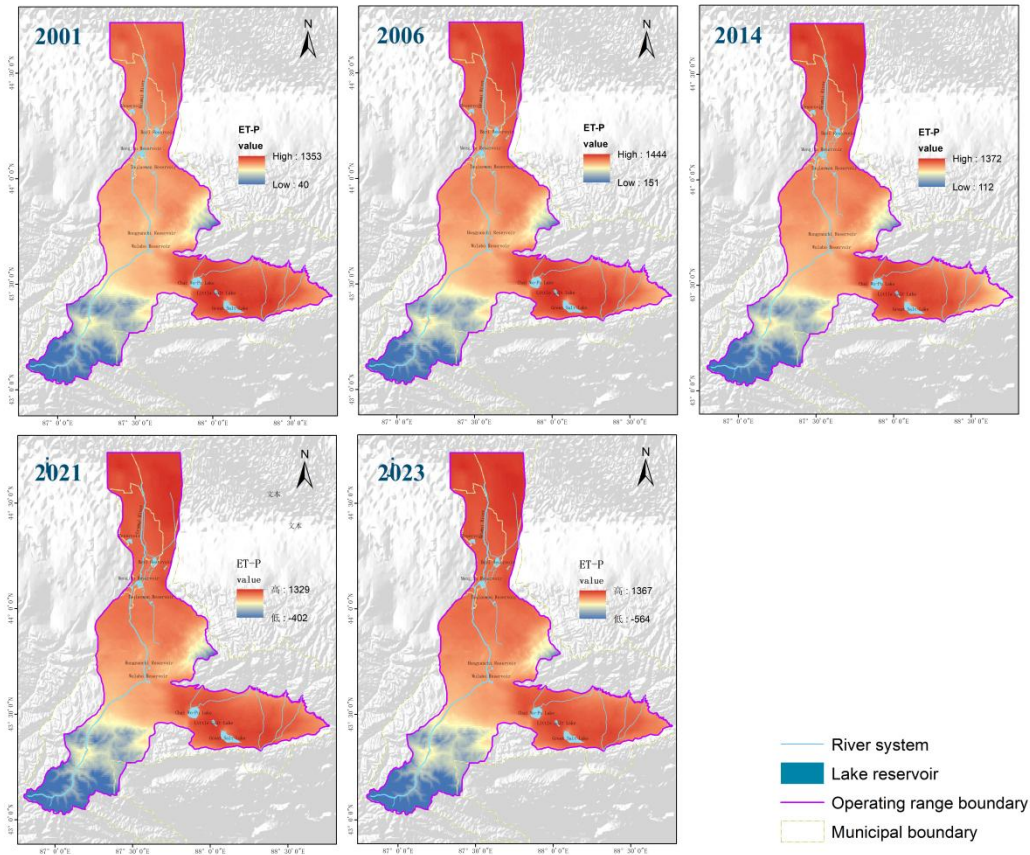

Figure S4: Distribution of E-P in Urumqi River and Chai Wo-pu Basin

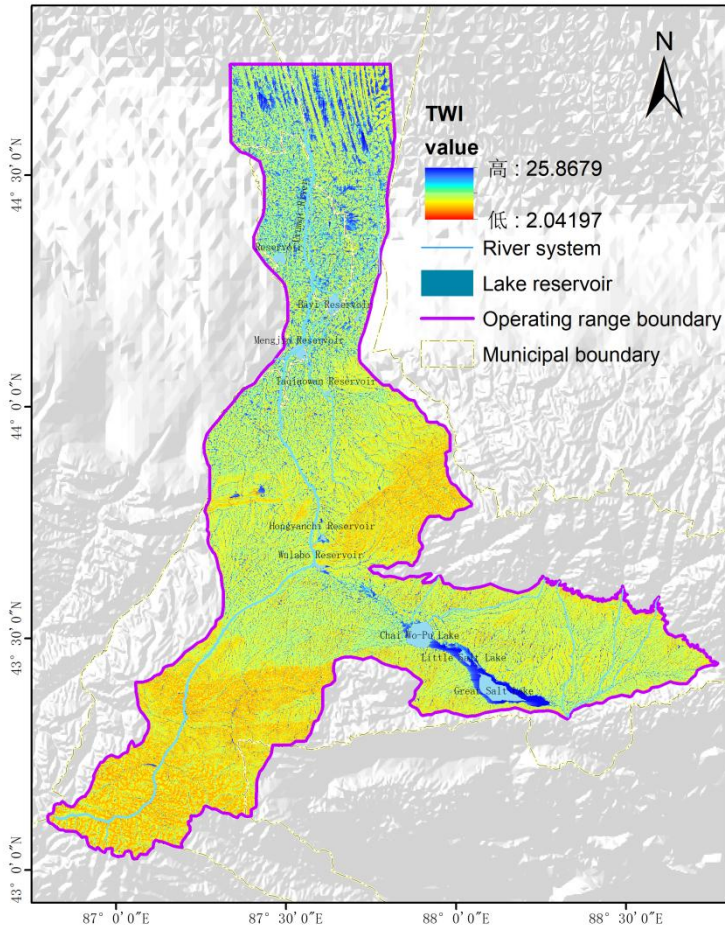

**Figure S5: Distribution of TWI in Urumqi River and Chai Wo-pu Basin**

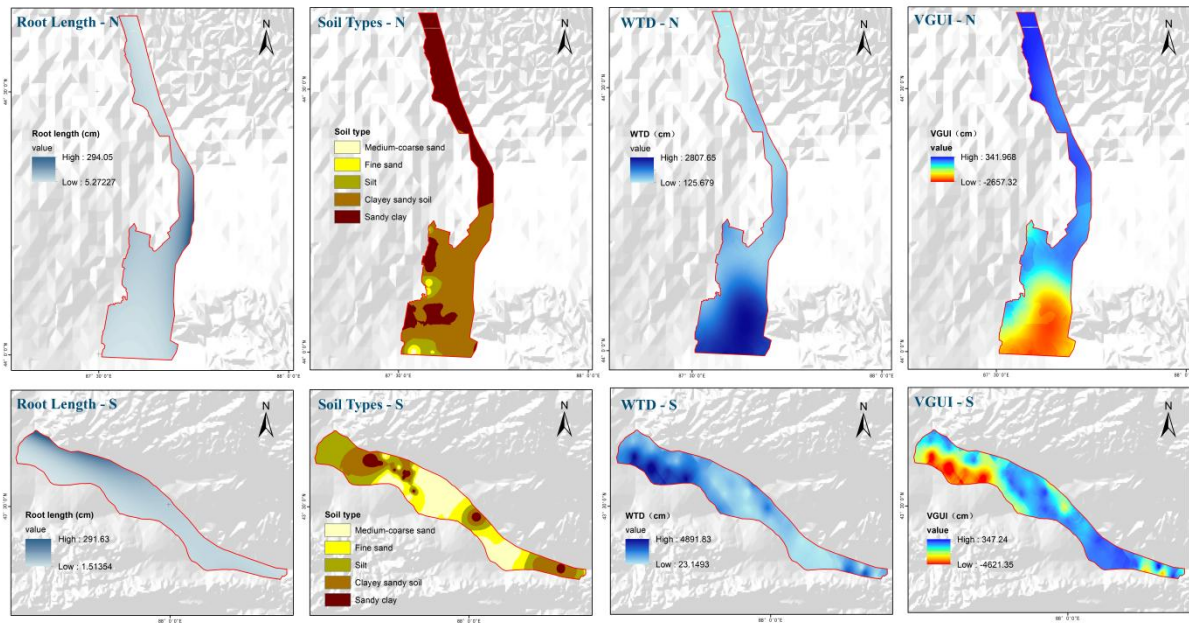

**Figure S6: Distribution of Vegetation Groundwater Uptake Index in the GDEs Typical Areas of the Urumqi River and Chai Wo-pu Basin**
